# Supplementary material for: Changes in notifiable infectious disease incidence in China during the COVID-19 pandemic
Source: PubMed Central journal article supplement (PMC8626444; doi:10.1038/s41467-021-27292-7), 2021-11-26
Supplement: 41467_2021_27292_MOESM2_ESM.pdf [file 41467_2021_27292_MOESM2_ESM.pdf]

File Name: Supplementary Data 1  
Description: Code and data for analyses
